# Supplementary material for: Comparison of mRNA Vaccinations with BNT162b2 or mRNA-1273 in Anti-CD20-Treated Multiple Sclerosis Patients
Source: MDPI journal article supplement (doi:10.3390/vaccines10060922), 2022-06-09
Supplement: s1 [file s1]

**Table S1.** Characteristics of MS patients treated with anti-CD20 drugs (Ocrelizumab, Rituximab). Continuous variables are displayed as the mean and 95% confidence interval; nominal variables are given as numbers and frequencies. AU: arbitrary units; CI: confidence interval; mL: milliliter; MS: multiple sclerosis; *n*: sample size; n.s.: not significant, defined as *p*-values  $\geq 0.05$  (comment borderline *p*-value center 0.051); PPMS: primary progressive multiple sclerosis; RMS: relapsing MS.

| Variables                                     | Total ( <i>n</i> = 74) | BNT162b2 ( <i>n</i> = 36) | mRNA-1273 ( <i>n</i> = 38) | <i>p</i> -Value |
|-----------------------------------------------|------------------------|---------------------------|----------------------------|-----------------|
| <b>Demographic Characteristics</b>            |                        |                           |                            |                 |
| Sex (female, <i>n</i> (%))                    | 41 (55.4)              | 17 (47.2)                 | 24 (63.2)                  | n.s.            |
| Age (years, mean (95% CI))                    | 46.6 (43.4–49.9)       | 45.4 (40.4–50.4)          | 47.8 (43.4–52.3)           | n.s.            |
| <b>Anti-CD20</b>                              |                        |                           |                            |                 |
| Rituximab                                     | 9 (12.7)               | 7 (19.4)                  | 2 (5.3)                    | n.s.            |
| Ocrelizumab                                   | 65 (87.8)              | 29 (80.6)                 | 36 (97.4)                  | n.s.            |
| <b>Center</b>                                 |                        |                           |                            |                 |
| Bern                                          | 26 (35.1)              | 17 (47.2)                 | 9 (23.7)                   | n.s.            |
| Lucerne                                       | 48 (64.9)              | 19 (52.8)                 | 29 (76.3)                  | n.s.            |
| <b>Diagnosis</b>                              |                        |                           |                            |                 |
| RMS                                           | 57 (77.0)              | 30 (83.3)                 | 27 (71.0)                  | n.s.            |
| PPMS                                          | 17 (23.0)              | 6 (16.7)                  | 11 (28.9)                  | n.s.            |
| <b>Vaccination</b>                            |                        |                           |                            |                 |
| Anti-spike IgG (AU/mL)                        | 28.0 (8.6–47.4)        | 25.6 (–1.1–52.3)          | 30.2 (0.8–59.6)            | n.s.            |
| Time between vaccination and sampling (years) | 0.35 (0.3–0.4)         | 0.41 (0.4–0.5)            | 0.29 (0.3–0.3)             | <b>0.001</b>    |
| Time between last dosage and sampling (years) | 0.44 (0.4–0.50)        | 0.51 (0.4–0.6)            | 0.38 (0.3–0.4)             | n.s.            |

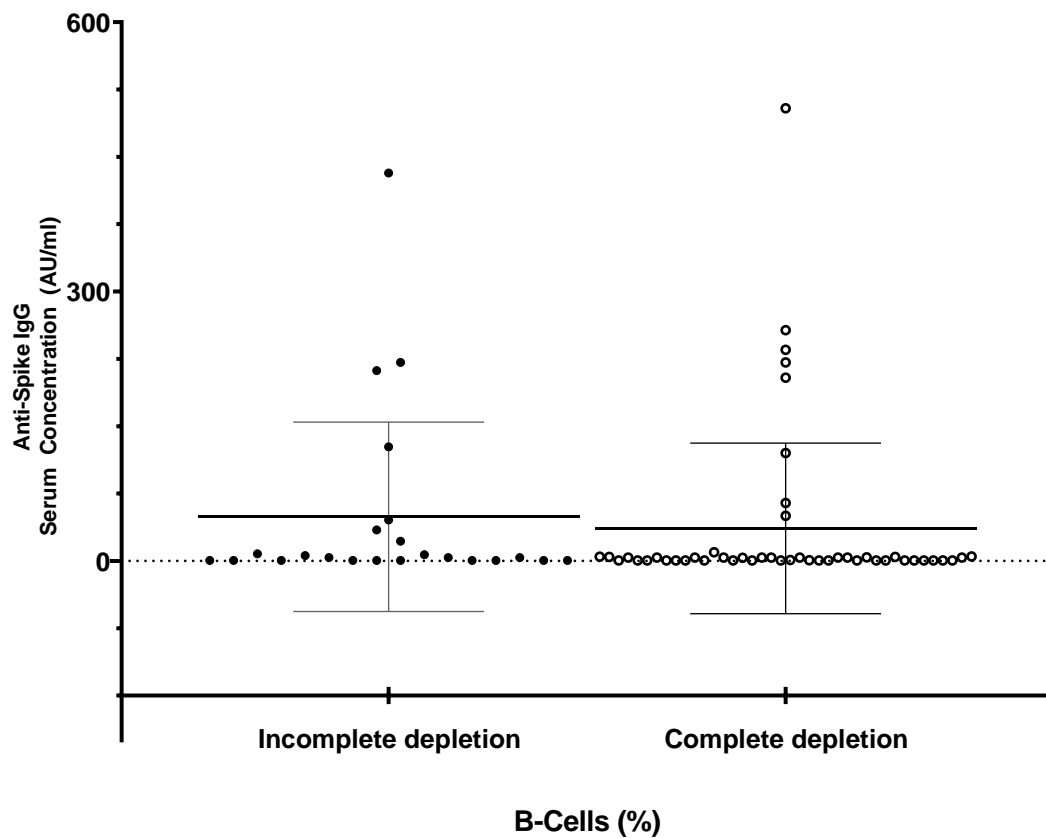

**Figure S1.** B-lymphocytes (%) of our cohort of anti-CD20-treated patients. AU: arbitrary units; mL: milliliter.
